# Supplementary material
Source: PubMed Central journal article supplement (PMC10697696)

Full unedited gel for Figure 1B

H9C2 Coomassie blue stain

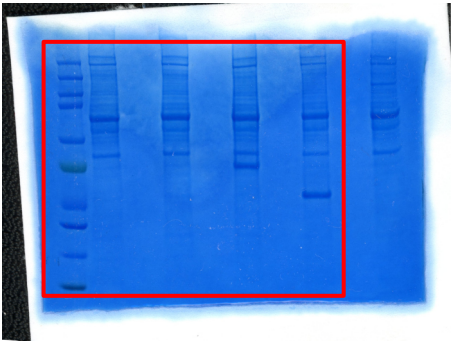

H9C2 autoradiogram

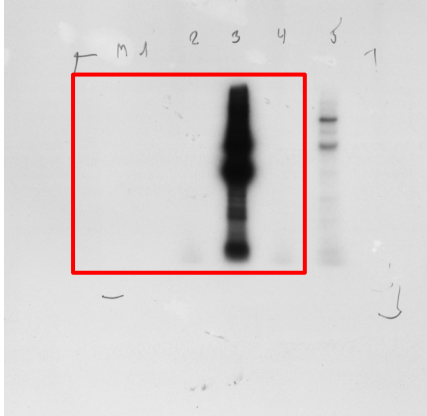

hiPSC-CM Coomassie blue stain

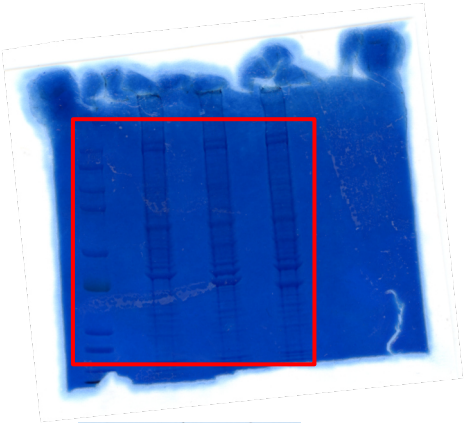

hiPSC-CM autoradiogram

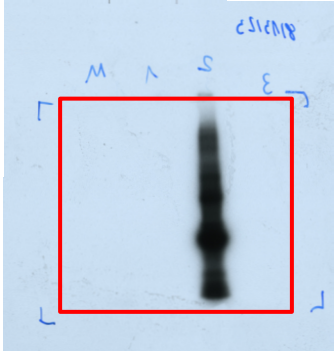

## Full unedited gel for Figure 1B

SQSTM1 colorimetric (ladder)  
+ chemiluminescent,  
H9c2 cell lysate

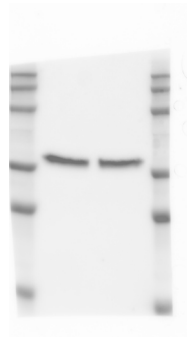

SQSTM1 chemiluminescent,  
H9c2 cell lysate

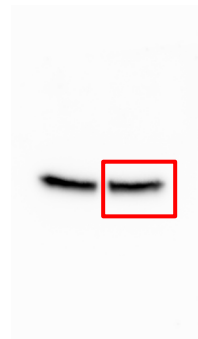

SQSTM1 colorimetric (ladder)  
+ chemiluminescent,  
hiPSC-CM lysate

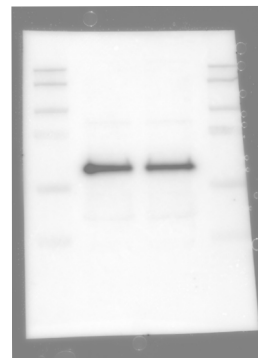

SQSTM1 chemiluminescent,  
hiPSC-CM lysate

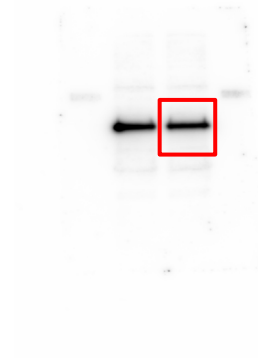

Full unedited gel for Figure 1G

p-SQSTM1

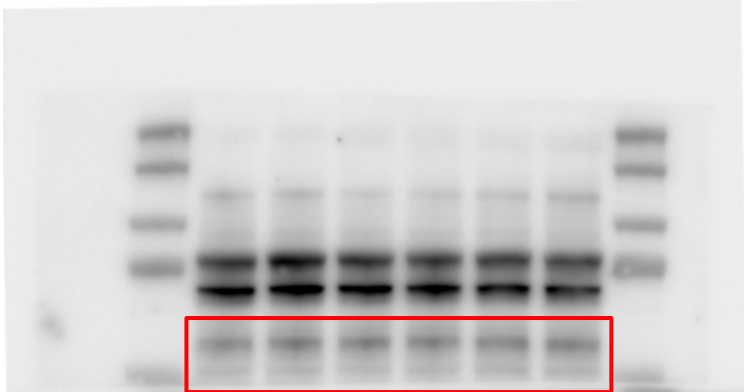

SQSTM1

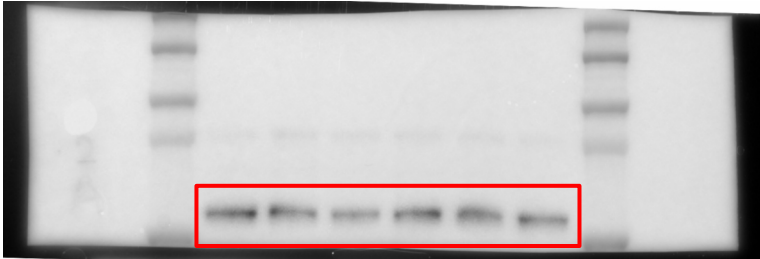

GAPDH

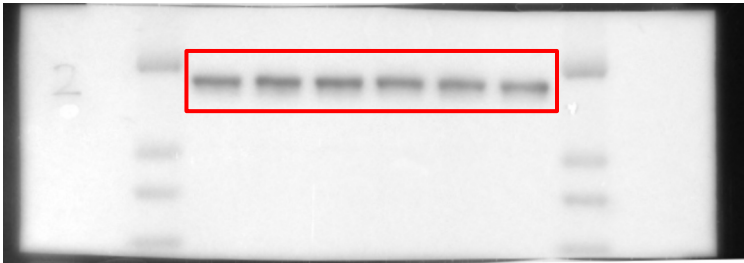

Supplement: NIHMS1939832-supplement-Uncropped_gel_blots.pdf [file NIHMS1939832-supplement-Uncropped_gel_blots.pdf]
